# Supplementary material
Source: MDPI journal article supplement (https://www.mdpi.com/2304-6767/7/4/94)
Supplement: s1 [file s1]

**Информированное согласие на проведение медицинского вмешательства на лечение кариеса, глубокого кариеса.  
Основание: Федеральный закон от 21.11.2011 № 323-ФЗ «Об основах охраны Здоровья граждан в Российской Федерации»)**

Я, (Ф.И.О.) \_\_\_\_\_, обращаюсь в медицинскую фирму «Витал ЕВВ» для лечения заболевания (указать) \_\_\_\_\_

1. Я, получил(а) информацию об особенностях течения заболевания, вероятной длительности лечения, о методах лечения, примерной стоимости, о вероятном прогнозе заболевания. Мне предложен план обследования и лечения, даны полные разъяснения о характере, целях и продолжительности, о возможных неблагоприятных эффектах диагностических процедур, а также о том, что предстоит делать мне во время их проведения.

Мне разъяснено, что я должен(на) пройти обязательные диагностические исследования для назначения лечения, адекватного состоянию моего здоровья на настоящий момент. В процессе лечения могут проводиться дополнительные диагностические исследования, как для контроля лечения, так и для выявления другой патологии.

Мне объяснено, и я понял(а), что существует вероятность того, что во время осуществления основного плана лечения выяснится необходимость в частичном или полном изменении данного плана лечения, включая дополнительные врачебные процедуры, которые невозможно достоверно и в полной мере предвидеть заранее.

**2. Целью лечения кариеса** является устранение его проявлений для предотвращения развития осложнений (пульпит, периодонтит). Кариес - это разрушение твердых тканей зуба, которое начинается с деминерализации (растворения минеральных веществ, входящих в состав зуба), с последующим образованием полости. Данный процесс происходит под действием бактерий, которые ферментируют углеводистые соединения, образуя при этом кислоты. Под действием данных кислот происходит выход минеральных компонентов из твердых тканей зуба. Факторам способствующими развитию кариеса является неудовлетворительная гигиена полости рта, диета, богатая легко ферментируемыми углеводами, наследственность и прочее. Кариес протекает в несколько этапов: пятно (белое или темное), поверхностный кариес, средний кариес, глубокий кариес.

**3. Сущность медицинского вмешательства.** Лечение кариеса заключается в удалении пораженных тканей зуба с использованием механической и хирургической (в некоторых случаях ультразвуковой и/или лазерной) обработки в пределах здоровых тканей зуба с последующим восстановлением формы зуба прямым или косвенным способом. При прямом способе восстановление пломбировочный материал вносится в полость зуба, при косвенном способе (как правило, при больших по размеру кариозных полостях) в лаборатории изготавливается вкладка и фиксируется на цемент.

**4. Альтернативные методы лечения.** Методов лечения кариеса без механической и медикаментозной обработки кариозной поверхности не существует.

**5. Риск при проведении лечения и возможные последствия:**

1. Размеры кариозной полости (в том числе и под старой пломбой) невозможно точно определить до ее раскрытия. Соответственно, говорить точно об объемах и методах восстановления разрушенного зуба (пломба, вкладка, коронка) можно будет только после полного удаления кариозных тканей. В некоторых случаях зубы, имеющие значительные поражения, не могут быть восстановлены и подлежат удалению.
2. При восстановлении эстетических показателей врач руководствуется классическими параметрами формы зубов, но часто объективные клинические данные пациента (цвет и объем оставшейся зубной ткани реставрируемого зуба, цвет и форма рядом стоящих зубов, состояние прикуса и т.д.), накладывают ограничения на достижение эстетического результата, ожидаемого пациентом.
3. После постановки пломбы в ходе лечения кариеса возможен временный дискомфорт в зубе (постоперативная чувствительность). В редких случаях сохранение болезненности может быть до 6 месяцев.
4. При постановке пломбы в случае глубокого кариеса, в течение нескольких дней может появиться боль в зубе, если в пульпе уже есть необратимое воспаление, протекавшее до лечения бессимптомно. Это связано с тем, что дентин способен пропускать часть бактерий через свою толщу в пульпу зуба, поэтому при повреждении в пульпе формируется очаг постоянного (хронического) воспаления, выраженность которого зависит от протяженности кариозного дефекта. Очаг воспаления сохраняется после удаления кариеса и пломбирования зуба, а его ликвидация зависит от состояния иммунной системы. По этой причине, спустя некоторое время после пломбирования зуба по поводу неосложненного кариеса, может потребоваться эндодонтическое вмешательство (лечение корневых каналов). Обострение заболевания в пульпе может возникнуть и в более отдаленные сроки, и это тоже приведет к эндодонтическому лечению.
5. Кроме того, даже при соблюдении наивысшей степени заботливости и осмотрительности, какая требуется по характеру выполняемой технологии от врача, возможны следующие риски:
  - при механической обработке (препарировании) зуба может произойти вскрытие полости зуба вследствие анатомических особенностей строения зуба;
  - возможно развитие медикаментозного пульпита (периодонтита) вследствие индивидуальной реакции на применяемые медикаменты;
  - перелом зуба;

Любые осложнения могут привести к удалению зуба, возникновения очага инфекции в челюстно-лицевой области, длительному болевому синдрому.

Выбор анестезиологического пособия я доверяю своему лечащему врачу, информирующему меня о последствиях и нежелательных результатах анестезии.

Я подтверждаю, что предложенная мне анкета о перенесённых мною заболеваниях и имевших место осложнениях заполнена мною лично и содержащаяся в ней информация достоверна.

**Я получил (а) полную информацию о гарантийных сроках**, действующих в стоматологической клинике "ВиталЕВВ": на корневую пломбу – 3 года; на лечение кариеса -1-3 года в зависимости от гигиенических индексов и общего состояния здоровья, клинической ситуации.

Понимая сложность предстоящего лечения, я обязуюсь приходить на контрольные осмотры два раза в год и следить за гигиеной полости рта. Я имел (а) возможность задать все интересующие меня вопросы.

Подпись пациента \_\_\_\_\_ Дата \_\_\_\_\_.

Подпись врача \_\_\_\_\_

**Примечание:** при приеме детей до 18 лет обязательно подписывается родителем

[illegible]

[illegible]
